# Supplementary material for: Quantitative SWATH-Based Proteomic Profiling for Identification of Mechanism-Driven Diagnostic Biomarkers Conferring in the Progression of Metastatic Prostate Cancer
Source: PubMed Central journal article supplement (PMC7156536; doi:10.3389/fonc.2020.00493), 2020-04-08

### Supplementary Figures

**Figure S1:** MTT assay results for treatment of PC-3 and LNCaP cells with TGF- $\beta$  for 24 hours (All the experiments were done in triplicates) *P*-value at  $<0.05$  was considered to be statistically significant.

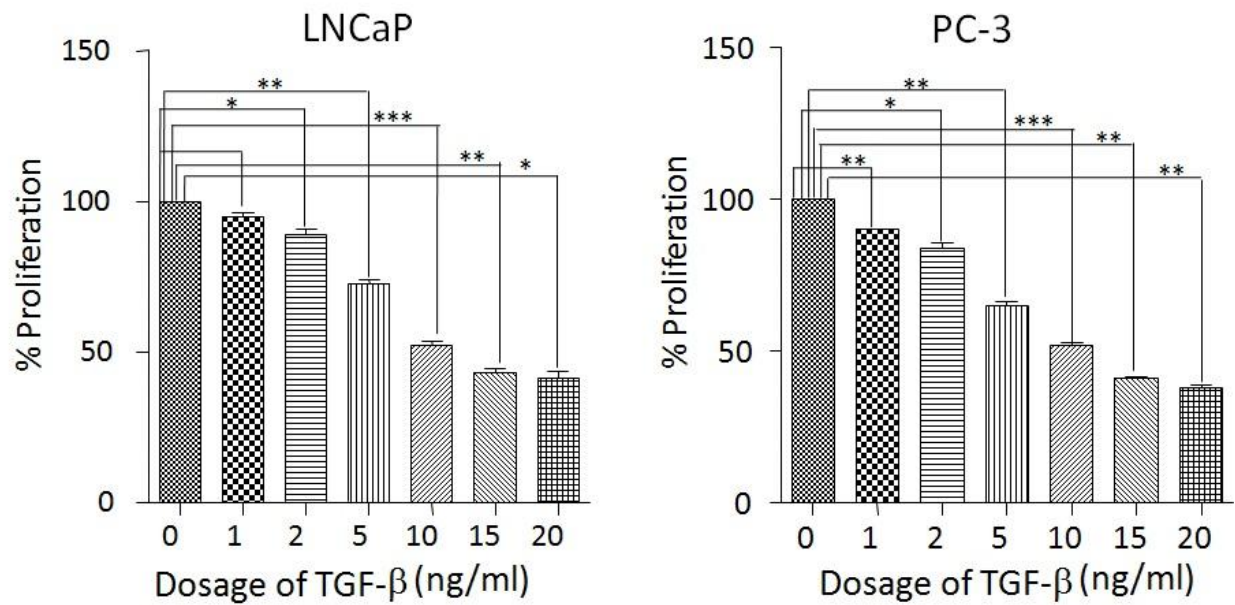

**Figure S2:** TGF- $\beta$  downregulates epithelial marker expression (E-cadherin) and promotes mesenchymal marker expressions (N-cadherin and Vimentin). Quantitative RT-PCR analysis showing mRNA expressions of EMT markers in (a) androgen dependent LNCaP and (b) androgen independent PC-3 Prostate cancer cell lines in naïve and post TGF- $\beta$  treatment conditions. The real-time PCR data are normalized to the  $\beta$ -actin reference gene and were analyzed by the comparative CT method. *P*-value at <0.05 was considered to be statistically significant. (c) Western blot data showing the expression of EMT markers (E-cadherin and N-cadherin) in LNCaP and PC-3 Prostate cancer cell lines in naïve and post TGF- $\beta$  treatment conditions using  $\beta$ -actin as internal control.

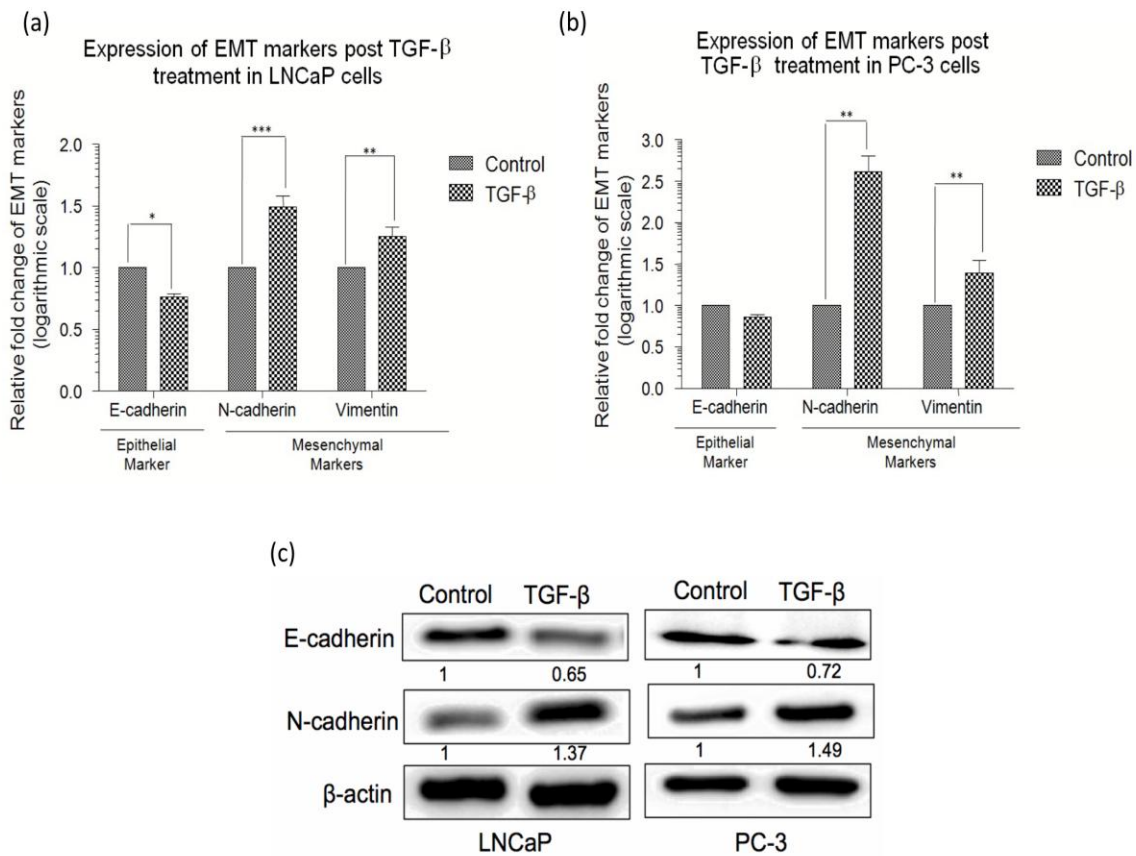

**Figure S3:** Network correlation of most deregulated pathways in Androgen dependent LNCaP cell line (The Purple and Pink dots represent the co-modulated functions by identified proteins and the grey lines represent the connection between the functions).

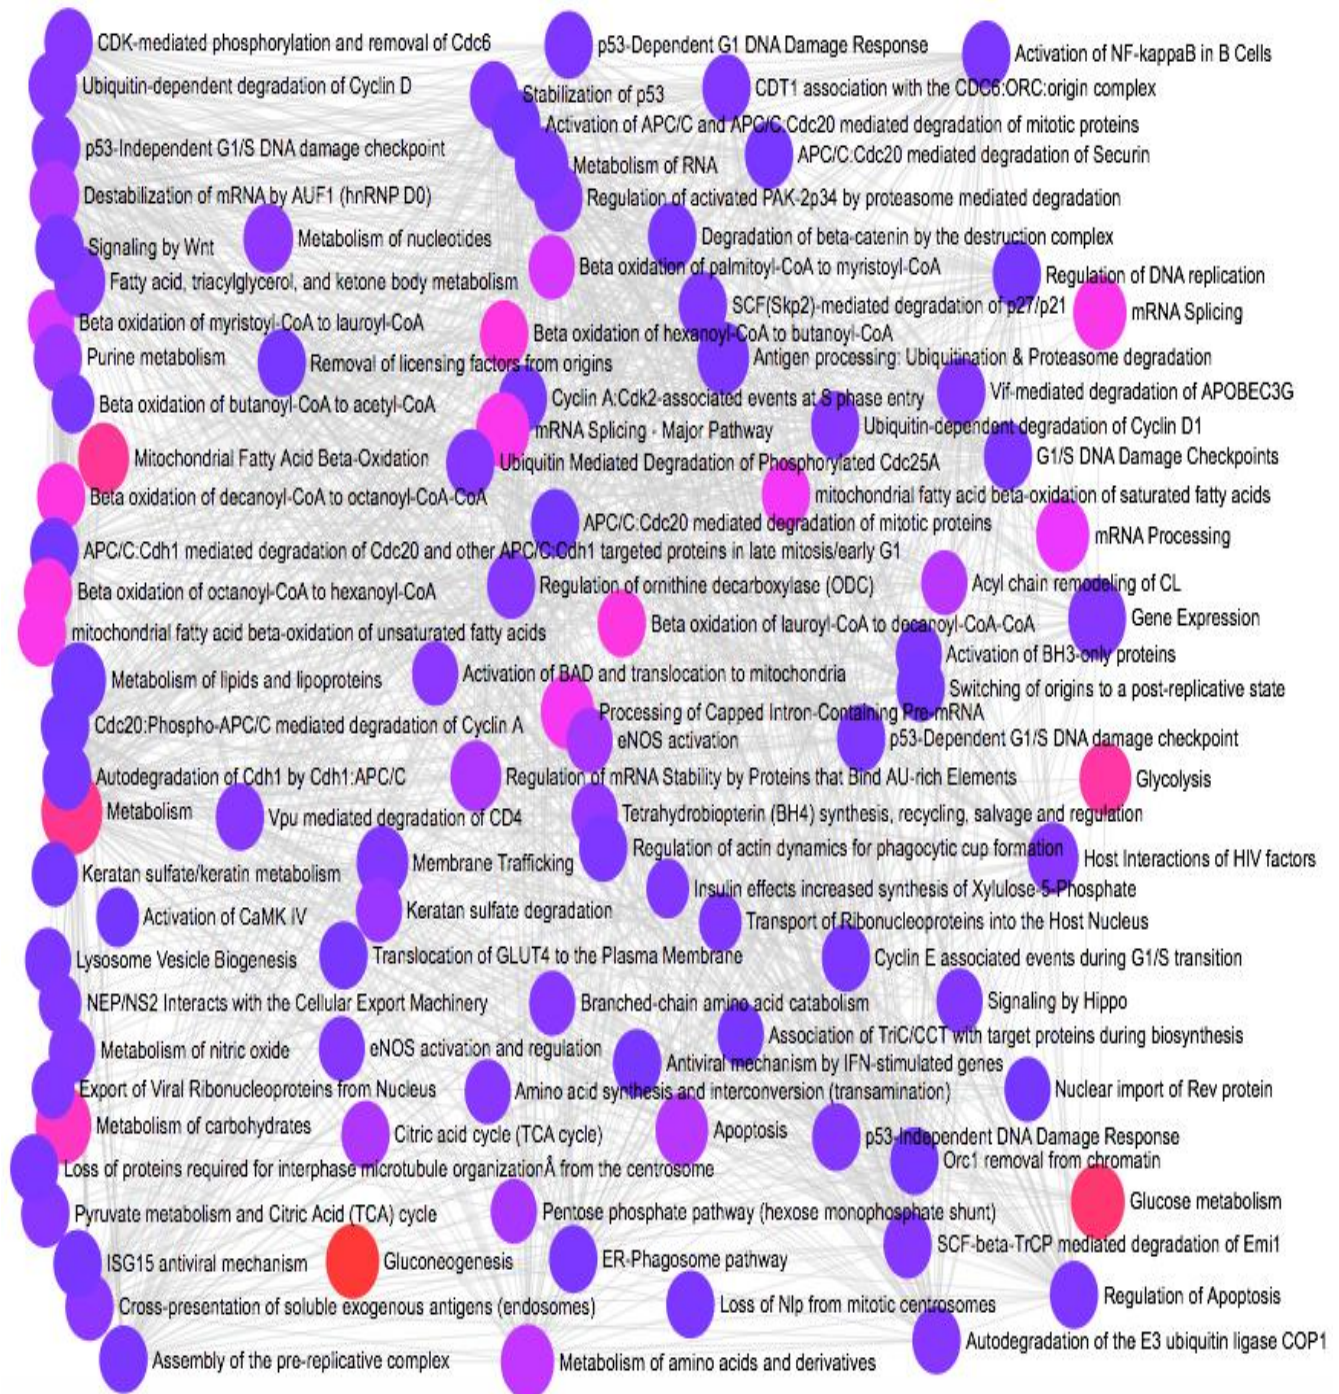



**Figure S4:** Network correlation of most deregulated pathways in Androgen independent PC-3 cell line (The Purple and Pink dots represent the co-modulated functions by identified proteins and the grey lines represent the connection between the functions).

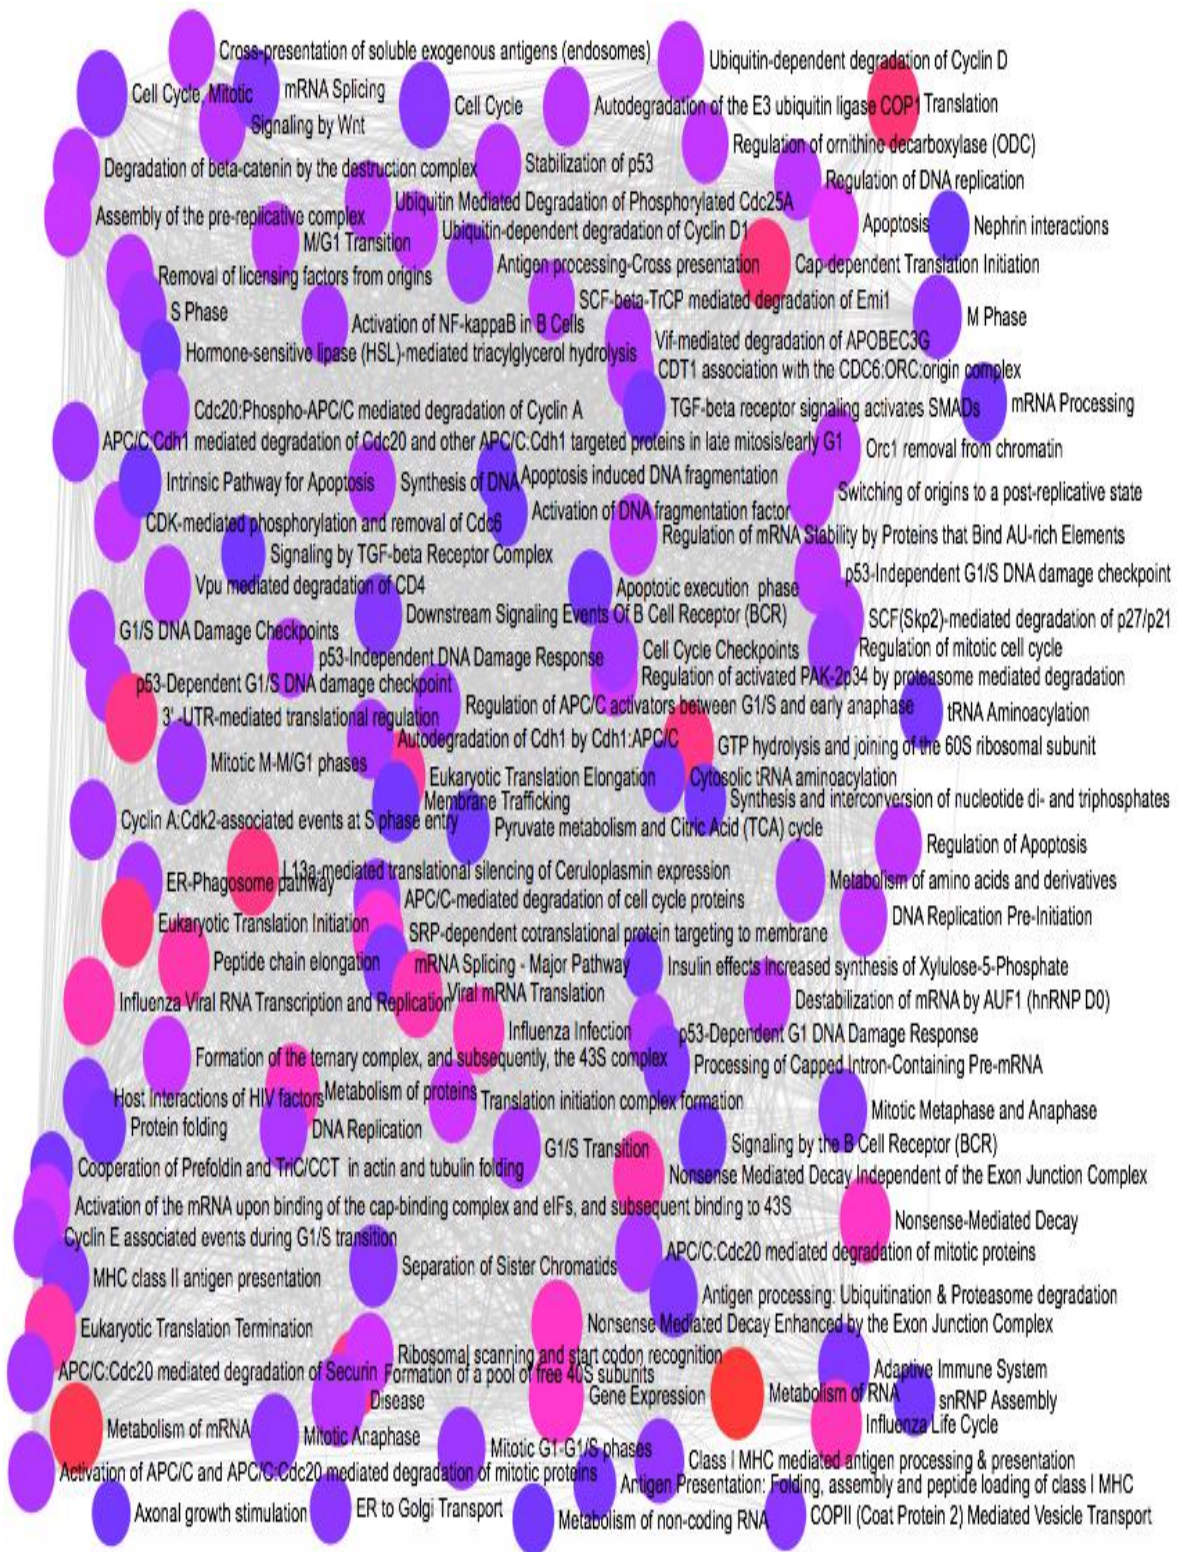

**Figure S5:** Protein–protein interactions (PPI) of the differentially expressed proteins in prostate cancer. Colored lines indicate the type of interaction evidence between nodes

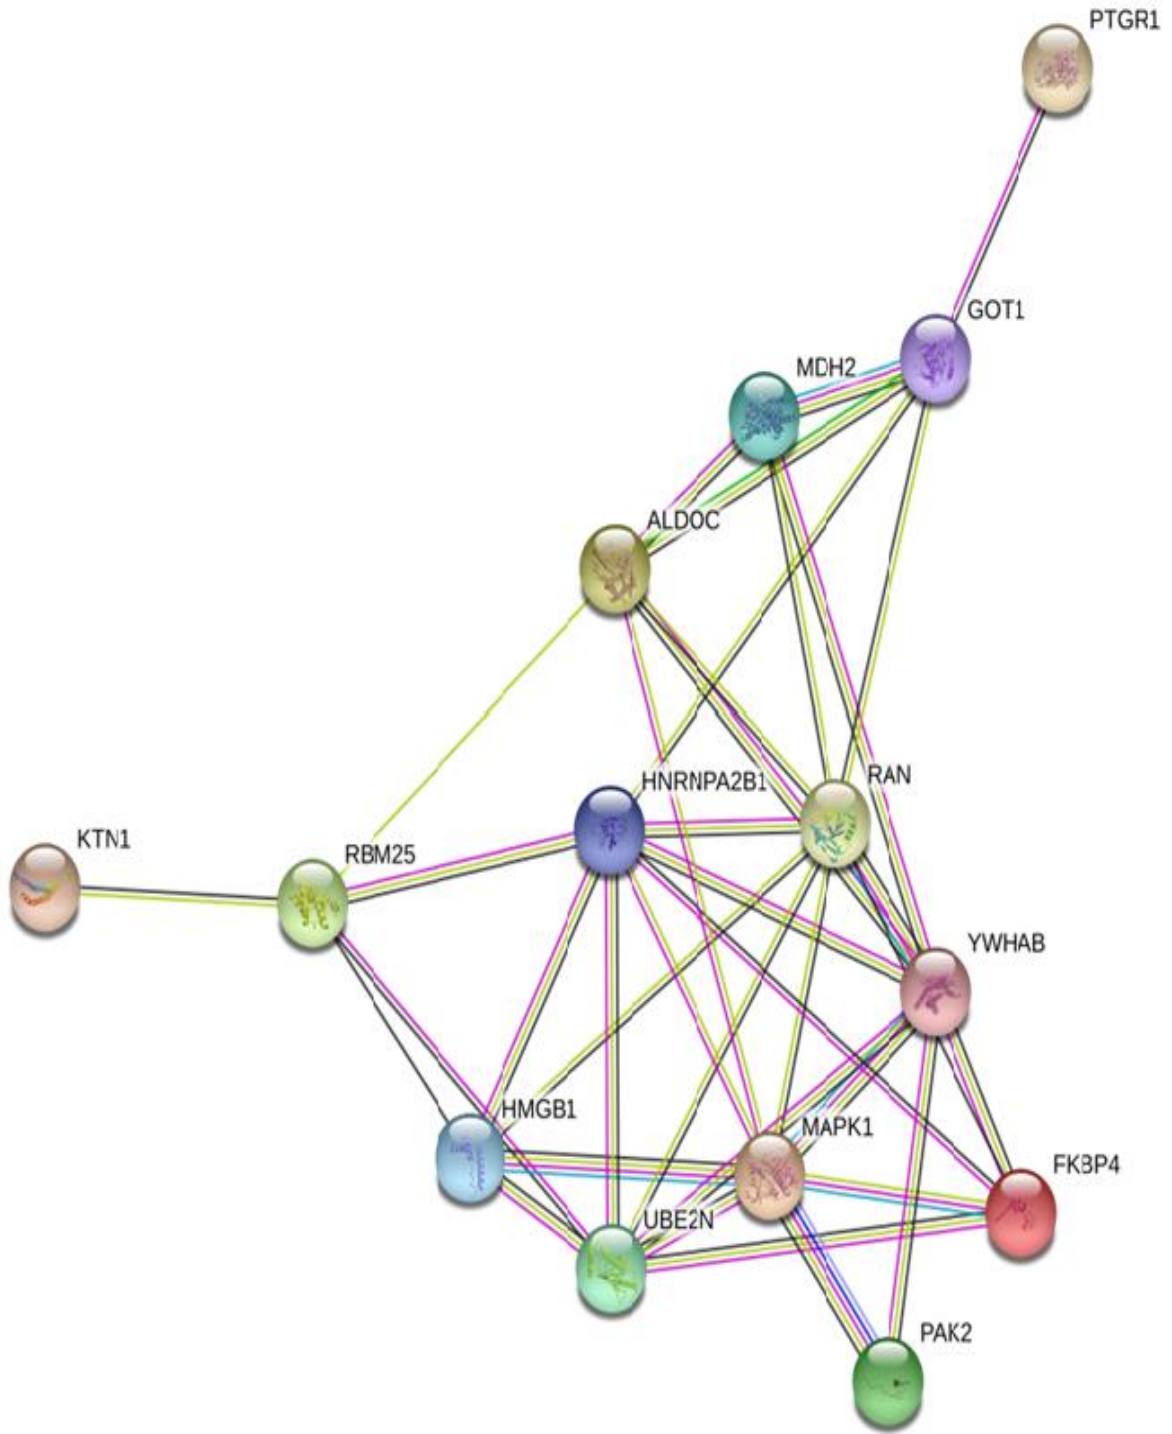

Supplement: Data_Sheet_1.pdf [file Data_Sheet_1.pdf]
